# Supplementary material for: JandaJel as a polymeric support to improve the catalytic efficiency of immobilized-1,5,7-triazabicyclo[4.4.0]dec-5-ene (TBD) under solvent-free conditions
Source: Royal Society of Chemistry journal article supplement (doi:10.1039/c1gc15790f), 2011-01-01

## Electronic Supplementary Information (ESI)

### JandaJel as a polymeric supports to improve the catalytic efficiency of immobilized-1,5,7-triazabicyclo[4.4.0]dec-5-ene (TBD) under solvent-free conditions.

Daniela Lanari,<sup>\*a</sup> Roberto Ballini,<sup>b</sup> Simona Bonollo,<sup>a</sup> Alessandro Palmieri,<sup>b</sup> Ferdinando Pizzo,<sup>a</sup> and Luigi Vaccaro<sup>\*a</sup>

<sup>a</sup> Laboratory of Green Synthetic Organic Chemistry, CEMIN - Dipartimento di Chimica, Università di Perugia Via Elce di Sotto, 8; Perugia, Italia.

Fax: +39 075 5855560; Tel: +39 075 5855541; E-mail: luigi@unipg.it

<sup>b</sup> "Green Chemistry Group" School of Science and Technology, Chemistry Division, Via S. Agostino 1, 62032 Camerino-Italy.

#### CONTENTS

|              |                                                                                                                                                          |
|--------------|----------------------------------------------------------------------------------------------------------------------------------------------------------|
| page S2-S3   | Experimental Section                                                                                                                                     |
| page S4-S6   | Representative experimental procedure for the synthesis of catalysts <b>1a-g</b> and characterization (elemental analysis, FT-IR, SEM).                  |
| page S7      | Representative experimental procedure for the Michael addition of thiols and the thiolysis of epoxides.                                                  |
| page S8-S10  | Full characterization data ( <sup>1</sup> H NMR, <sup>13</sup> C NMR, GC-EIMS, mp, elemental analyses) for compounds <b>10, 11, 12, 18, 19, 20, 29</b> . |
| page S11-S17 | Copies of the <sup>1</sup> H and <sup>13</sup> C NMR for compounds <b>10, 11, 12, 18, 19, 20, 29</b> .                                                   |

## Experimental section

All chemicals were purchased and used without any further purification.

GC analyses were performed by using Hewett-Packard HP 5890 series II equipped with a capillary column SPB-5 (30 m, 0.25 mm), a FID detector and hydrogen as gas carrier. GC-EIMS analyses were carried out by using a Hewett-Packard HP 6890 Series GC system/5973 Mass Selective Detector equipped with a electron impact ionizer at 70 eV. All  $^1\text{H}$  NMR and  $^{13}\text{C}$  NMR spectra were recorded at 200 MHz or 400 MHz, and at 50.3 or 100.6 MHz respectively, using a Bruker DRX-ADVANCE 200 MHz and a Bruker DRX-ADVANCE 400 MHz spectrometers. Deuterated solvents were used with the residual peak as internal standard, or TMS in the case of  $\text{CDCl}_3$ . Chemical shift was reported in ppm and coupling constants in Hertz. All melting points were measured with Buchi Melting Point 510 apparatus and are uncorrected. Microanalyses were realized by using a Carlo Erba Elemental analyzer mod. 1106. Thin Layer Chromatography analyses were performed on silica gel on aluminum plates and UV and/or  $\text{KMnO}_4$  were used as revealing systems. Column chromatographies were performed by using silica gel 230-400 mesh and eluting as reported below. SEM pictures of gold coated polymers (instrument EMITECH K55OX SPUTTER COATER) were taken on a SEM XL30 PHILIPS. FTIR spectra were recorded on a Bruker ISF 28.

Compounds **4**,<sup>1</sup> **6**,<sup>2</sup> **7**,<sup>3</sup> **8**,<sup>4</sup> **9**,<sup>5</sup> **13**,<sup>1</sup> **14**,<sup>6</sup> **15**,<sup>4</sup> **16**,<sup>7</sup> **17**,<sup>8</sup> **21**,<sup>1</sup> **22**,<sup>2</sup> **23**,<sup>1</sup> **24**,<sup>9</sup> **25** ( $\alpha$  and  $\beta$  regioisomers),<sup>10</sup> **26** ( $\alpha$  and  $\beta$  regioisomers),<sup>11</sup> **27** ( $\alpha$  and  $\beta$  regioisomers),<sup>12</sup> **28** ( $\alpha$ <sup>13</sup> and  $\beta$ <sup>14</sup> regioisomers), **30**,<sup>11</sup> **31**,<sup>14</sup> **32**,<sup>15</sup> **33**,<sup>16</sup> **34**,<sup>11</sup> **35**,<sup>12</sup> **36**,<sup>17</sup> are known and their spectroscopic data are in agreement with those reported in literature.

Compounds **10**, **11**, **12**, **18**, **19**, **20**, **29** are new and their characterization data ( $^1\text{H}$  NMR,  $^{13}\text{C}$  NMR, GC-EIMS, mp and elemental analyses) are reported below.

## References

- 1) S. Bonollo, D. Lanari, F. Pizzo, L. Vaccaro, *Org. Lett.*, **2011**, *13*, 2150-2152.
- 2) W. Su, J. Chen, H. Wu, C. Jin, *J. Org. Chem.*, **2007**, *72*, 4524-4527.
- 3) C.-M. Chu, S. Gao, M. N. V. Sastry, C.-W. Kuo, C. Lu, J.-T. Liu, C.-F. Yao, *Tetrahedron*, **2007**, *63*, 1863-1871.
- 4) M. Bandini, P. G. Cozzi, M. Giacomini, P. Melchiorre, S. Selva, A. Umani-Ronchi, *J. Org. Chem.*, **2002**, *67*, 3700-3704.
- 5) P. Ricci, A. Carlone, G. Bartoli, M. Bosco, L. Sambri, P. Melchiorre, *Adv. Synth. Cat.*, **2008**, *350*, 49-53.
- 6) N. Srivastava, B. K. Banik, *J. Org. Chem.*, **2003**, *68*, 2109-2114.
- 7) N. Prabakaran, G. Sundararajan, *Tetrahedron: Asymmetry*, **2002**, *13*, 1053-1058.
- 8) E. Emori, T. Arai, H. Sasai, M. Shibasaki, *J. Am. Chem. Soc.*, **1998**, *120*, 4043-4044.
- 9) M. Chini, P. Crotti, E. Giovani, F. Macchia, M. Pineschi, *Synlett*, **1992**, 303-305.
- 10) F. Fringuelli, F. Pizzo, C. Vittoriani, L. Vaccaro, *Eur. J. Org. Chem.*, **2006**, 1231-1236.
- 11) F. Fringuelli, F. Pizzo, S. Tortoioli, L. Vaccaro, *Adv. Synth. Cat.*, **2002**, *344*, 379-384.
- 12) M.-H. Yang, G.-B. Yan, Y.-F. Zheng, *Tetrahedron Lett.*, **2008**, *49*, 6471-6474.
- 13) B. P. Bandgar, A. V. Patil, O. S. Chavan, V. T. Kamble, *Catal. Commun.*, **2007**, *8*, 1065-1069.
- 14) M. Node, K. Nishide, Y. Shlgeta, K. Obata, H. Shiraki, H. Kunishige, *Tetrahedron*, **1997**, *53*, 12883-12894.
- 15) B. C. Ranu, T. Mandal, S. Banerjee, S. S. Dey, *Aust. J. Chem.*, **2007**, *60*, 278-283.

- 16) H. Yu, D. Dong, Y. Ouyang, Y. Wang, Q. Liu, *Synlett*, **2007**, 151-155.  
17) J. Sun, M. Yang, F. Yuan, X. Jia, X. Yang, Y. Pan, C. Zhu, *Adv. Synth. Cat.*, **2009**, 351, 920-930.

## Representative experimental procedure for the synthesis of JJ-TBD 1a

A two-necked round-bottomed flask (25 ml) equipped with a magnetic stirrer, reflux condenser, and inert gas in- and outlet was charged with 7 ml of anhydrous THF and TBD (0.134 g, 0.96 mmol). The stirred solution was cooled to -78°C, and n-BuLi in hexane (0.6 ml, 0.96 mmol) was added drop wise under nitrogen. After the addition was complete, the solution was stirred for additional 2 h and JandaJel-Cl (200-400 mesh, 2% cross-linked, 1.163 g, 0.55 mmol Cl/g, 0.64 mmol) was added to the solution. The mixture was allowed to warm slowly to room temperature and stirred for 48 h under nitrogen. Then 2 ml of methanol were added to the reaction mixture, the polymer beads were isolated by filtration and washed thoroughly with THF-MeOH (1:1), methanol, methanol-water (1:1), acetone, THF, and dichloromethane. The catalyst was subsequently dried under vacuum for 15 h at room temperature and 4 h at 50 °C furnishing JJ-TBD **1a** as a yellow solid. Elemental analysis: C, 87.76; H, 7.69; N, 1.45; 0.34 mmol TBD/g.

Data for:

JJ-TBD 100-200 mesh, 2% cross-linked **1b**: Yellow solid. Elemental analysis: C, 87.47; H, 7.71; N, 2.04; 0.48 mmol TBD/g.

JJ-TBD 50-100 mesh, 2% cross-linked **1c**: Yellow solid. Elemental analysis: C, 89.17; H, 8.10, N, 2.07; 0.49 mmol TBD/g.

JJ-TBD 100-200 mesh, 1% cross-linked **1d**: Yellow solid. Elemental analysis: C, 88.98; H, 7.87, N, 2.54; 0.60 mmol TBD/g.

PS-TBD 200-400 mesh, 2% cross-linked **1e**: Pale yellow solid. Elemental analysis: C, 73.98; H, 8.90, N, 10.12; 2.41 mmol TBD/g.

PS-TBD 100-200 mesh, 2% cross-linked **1f**: White solid. Elemental analysis: C, 74.12; H, 8.43, N, 9.98; 2.38 mmol TBD/g.

PS-TBD 50-100 mesh, 1% cross-linked **1g**: Pale yellow solid. Elemental analysis: C, 75.02; H, 8.19, N, 10.27; 2.45 mmol TBD/g.

FTIR spectra of JandaJel-TBD catalyst **1a** in comparison to those of the starting material JandaJel-Cl.

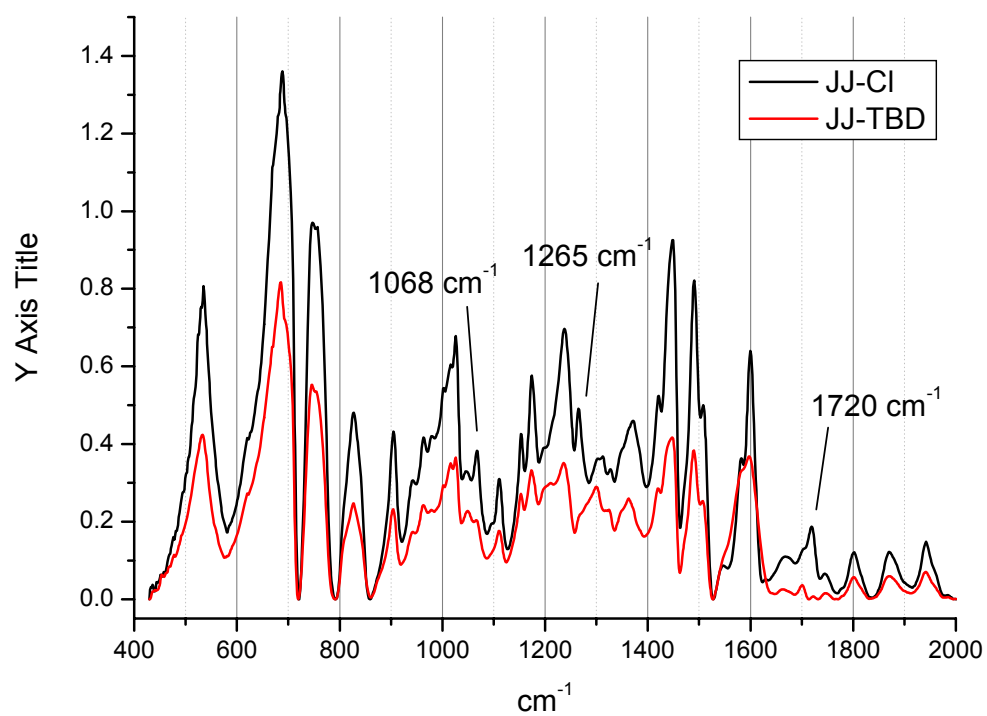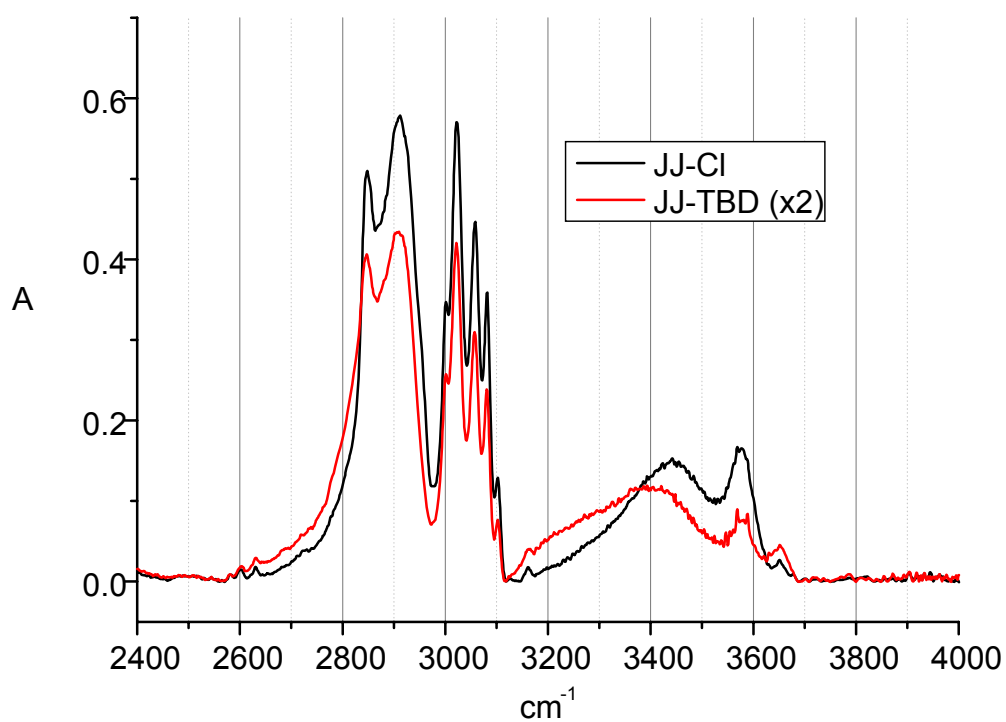

Representative SEM IMAGE for catalyst **1a**. Size and pictures for all the other catalysts were identical.

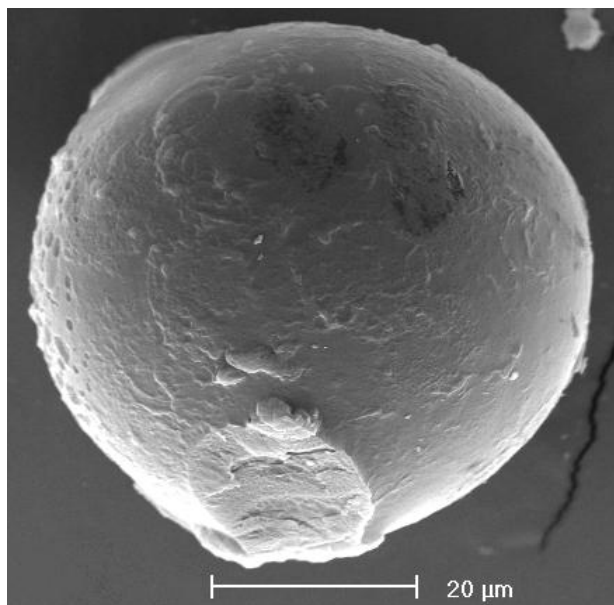

**Representative experimental procedure for the Michael addition of 1-butanethiol (3a) to (*E*)-benzylideneacetone (2a) catalyzed by polymer-supported-TBD 1a-h under solvent-free conditions.**

In a screw-capped vial equipped with a magnetic stirrer JJ-TBD **1b** (0.021 g, 0.48 mmol TBD/g, 0.01 mmol), (*E*)-benzylideneacetone (**2a**) (0.292 g, 2.0 mmol) and 1-butanethiol (**3a**) (0.215 ml, 2 mmol) were consecutively added and the resulting mixture was left under stirring at 30 °C. After 40 minutes, ethyl acetate was added, the catalyst recovered by filtration, and the organic solvent evaporated under vacuum to give  $\geq 98\%$  pure 4-(butylthio)-4-phenylbutan-2-one (**4**) as a yellowish oil (0.463 g, 98% yield).

**Representative experimental procedure for the thiolysis of 2,3-epoxypropyl-phenylether (5a) by thiophenol (3b) catalyzed by polymer-supported-TBD 1a-h under solvent-free conditions.**

In a screw-capped vial equipped with a magnetic stirrer JJ-TBD **1b** (0.031 g, 0.48 mmol TBD/g, 0.015 mmol), 2,3-epoxypropyl-phenylether (**5a**) (0.410 ml, 3.03 mmol) and thiophenol (**3b**) (0.311 ml, 3.03 mmol) were consecutively added and the resulting mixture was left under stirring at 30 °C. After 100 minutes, ethyl acetate was added, the catalyst recovered by filtration, and the organic solvent evaporated under vacuum to give  $\geq 98\%$  pure 1-phenoxy-3-(phenylthio)propan-2-ol (**6**) as a colourless oil (0.764 g, 97% yield).

## Characterization data for new compounds 10, 11, 12, 18, 19, 20, 29.

### 4-Butylsulfanyl-4-(4-chlorophenyl)-butan-2-one (10)

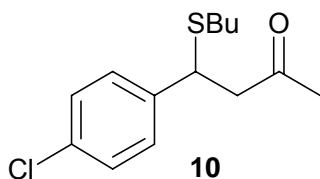

Isolated in 99% yield. Colourless oil.  $^1\text{H}$  NMR ( $\text{CDCl}_3$ , 400 MHz)  $\delta$  = 0.84 (t, 3H,  $J$  = 7.3 Hz), 1.20-1.40 (m, 2H), 1.40-1.55 (m, 2H), 2.09 (s, 3H), 2.20-2.40 (m, 2H), 2.90-3.00 (m, 2H), 4.29 (t, 1H,  $J$  = 7.2 Hz), 7.20-7.35 (m, 4H).  $^{13}\text{C}$  NMR ( $\text{CDCl}_3$ , 100.6 MHz)  $\delta$  = 205.2, 140.7, 132.8, 129.1, 128.6, 50.0, 43.3, 31.1, 31.0, 30.7, 21.9, 13.6. Anal. calc. for  $\text{C}_{14}\text{H}_{19}\text{ClOS}$  (FW 271): C, 62.09; H, 7.07; S 11.84. Found: C, 61.81; H, 7.04; S, 11.89. GC-EIMS ( $m/z$ , %) 270 ( $\text{M}^+$ , 63), 213 (46), 184 (27), 183 (27), 182 (84), 181 (54), 138 (61), 103 (42), 102 (24), 77 (23), 43 (100).

### 4-(4-Chlorophenyl)-4-phenylsulfanyl-butan-2-one (11)

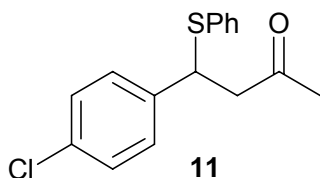

Isolated in 99% yield. White solid, m.p. = 101-103 °C.  $^1\text{H}$  NMR ( $\text{CDCl}_3$ , 400 MHz)  $\delta$  = 2.05 (s, 3H), 3.00 (d, 2H,  $J$  = 7.3 Hz), 4.66 (t, 1H,  $J$  = 7.2 Hz), 7.10-7.30 (m, 9H).  $^{13}\text{C}$  NMR ( $\text{CDCl}_3$ , 100.6 MHz)  $\delta$  = 205.0, 139.7, 133.4, 132.9, 132.9, 129.0, 128.8, 128.5, 127.8, 49.1, 47.2, 30.5. Anal. calc. for  $\text{C}_{16}\text{H}_{15}\text{ClOS}$  (FW 291): C, 66.08; H, 5.20; S 11.03. Found: C, 65.78; H, 5.18; S, 11.08. GC-EIMS ( $m/z$ , %) 291 ( $\text{M}^+$ , 7), 290 (40), 181 (88), 43 (100).

### 4-(4-Chlorophenyl)-4-*p*-tolylsulfanyl-butan-2-one (12)

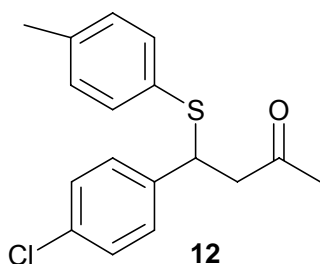

Isolated in 96% yield. White solid, m.p. = 89-91 °C.  $^1\text{H}$  NMR ( $\text{CDCl}_3$ , 400 MHz)  $\delta$  = 2.05 (s, 3H), 2.28 (s, 3H), 2.99 (d, 2H,  $J$  = 7.4 Hz), 4.59 (t, 1H,  $J$  = 7.2 Hz), 7.03 (d, 2H,  $J$  = 7.8 Hz), 7.10-7.23 (m, 6H).  $^{13}\text{C}$  NMR ( $\text{CDCl}_3$ , 100.6 MHz)  $\delta$  = 205.0, 139.7, 138.0, 133.5, 132.8, 129.6, 128.9, 128.4, 49.0, 47.6, 30.5, 21.0. Anal. calc. for  $\text{C}_{17}\text{H}_{17}\text{ClOS}$  (FW 305): C, 66.98; H, 5.62; S 10.52. Found: C, 67.30; H, 5.59; S, 10.55. GC-EIMS ( $m/z$ , %) ( $\text{M}^+$ , 34), 181 (45), 124 (81), 91 (22), 43 (100).



#### 4-Butylsulfanyl-heptan-2-one (18)

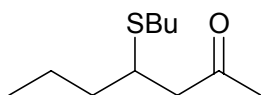

18

Isolated in 88% yield. Colourless oil.  $^1\text{H}$  NMR ( $\text{CDCl}_3$ , 400 MHz)  $\delta$  = 0.85-1.05 (m, 6H), 1.30-1.65 (m, 8H), 2.15 (s, 3H), 2.48 (t, 2H,  $J$  = 7.4 Hz), 2.61 (dd, 1H,  $J$  = 6.7, 16.7 Hz), 2.69 (dd, 1H,  $J$  = 7.1, 16.7 Hz), 3.00-3.15 (m, 1H).  $^{13}\text{C}$  NMR ( $\text{CDCl}_3$ , 100.6 MHz)  $\delta$  = 207.1, 49.7, 40.3, 37.5, 31.8, 30.7, 30.5, 22.0, 19.9, 13.8, 13.6. Anal. calc. for  $\text{C}_{11}\text{H}_{22}\text{OS}$  (FW 202): C, 65.29; H, 10.96; S 15.85. Found: C, 65.58; H, 11.00; S, 15.79. GC-EIMS ( $m/z$ , %) ( $\text{M}^+$ , 48), 145 (32), 117 (22), 55 (20), 43 (100).

#### 4-Phenylsulfanyl-heptan-2-one (19)

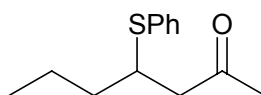

19

Isolated in 98% yield. Colourless oil.  $^1\text{H}$  NMR ( $\text{CDCl}_3$ , 400 MHz)  $\delta$  = 0.90 (t, 3H,  $J$  = 6.9 Hz), 1.40-1.65 (m, 4H), 2.12 (s, 3H), 2.63 (dd, 1H,  $J$  = 7.3, 17.1 Hz), 2.72 (dd, 1H,  $J$  = 6.2, 17.1 Hz), 3.55-3.65 (m, 1H), 7.20-7.35 (m, 3H), 7.35-7.45 (m, 2H).  $^{13}\text{C}$  NMR ( $\text{CDCl}_3$ , 100.6 MHz)  $\delta$  = 206.8, 134.4, 132.2, 128.9, 127.0, 49.0, 43.4, 36.9, 30.6, 20.0, 13.7. Anal. calc. for  $\text{C}_{13}\text{H}_{18}\text{OS}$  (FW 222): C, 70.22; H, 8.16; S 14.42. Found: C, 70.54; H, 8.18; S, 14.35. GC-EIMS ( $m/z$ , %) ( $\text{M}^+$ , 60), 110 (96), 109 (28), 43 (100).

#### 4-*p*-Tolylsulfanyl-heptan-2-one (20)

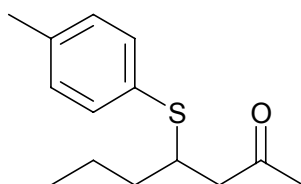

20

Isolated in 97% yield. Colourless oil.  $^1\text{H}$  NMR ( $\text{CDCl}_3$ , 400 MHz)  $\delta$  = 0.90 (t, 3H,  $J$  = 6.4 Hz), 1.40-1.60 (m, 4H), 2.12 (s, 3H), 2.33 (s, 3H), 2.59 (dd, 1H,  $J$  = 7.3, 17.0 Hz), 2.69 (dd, 1H,  $J$  = 6.3, 17.0 Hz), 3.45-3.55 (m, 1H), 7.10 (d, 2H,  $J$  = 7.9 Hz), 7.31 (d, 2H,  $J$  = 8.0 Hz).  $^{13}\text{C}$  NMR ( $\text{CDCl}_3$ , 100.6 MHz)  $\delta$  = 206.9, 137.4, 133.1, 130.4, 129.6, 49.0, 43.8, 36.8, 30.6, 21.0, 20.0, 13.8. Anal. calc. for  $\text{C}_{14}\text{H}_{20}\text{OS}$  (FW 236): C, 71.14; H, 8.53; S 13.57. Found: C, 70.80; H, 8.49; S, 13.52. GC-EIMS ( $m/z$ , %) ( $\text{M}^+$ , 100), 151 (26), 137 (44), 124 (100), 123 (85), 113 (30), 91 (100), 79 (39), 77 (40), 45 (29), 43 (100).

#### 1-Butylsulfanyl-octan-2-ol (29)

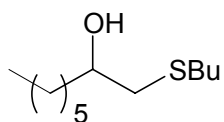

**29**

Isolated in 90% yield. Colourless oil.  $^1\text{H}$  NMR ( $\text{CDCl}_3$ , 400 MHz)  $\delta$  = 0.85-1.00 (m, 6H), 1.25-1.65 (m, 15H), 2.43 (dd, 1H,  $J$  = 9.1, 13.6 Hz), 2.52 (t, 2H,  $J$  = 7.4 Hz), 2.74 (dd, 1H,  $J$  = 3.2, 13.6 Hz), 3.55-3.65 (m, 1H).  $^{13}\text{C}$  NMR ( $\text{CDCl}_3$ , 100.6 MHz)  $\delta$  = 69.1, 40.3, 36.3, 31.9, 31.8, 29.3, 25.8, 22.6, 22.0, 14.1, 13.7. Anal. calc. for  $\text{C}_{12}\text{H}_{26}\text{OS}$  (FW 218): C, 65.99; H, 12.00; S 14.68. Found: C, 66.72; H, 11.96; S, 14.73. GC-EIMS ( $m/z$ , %) 218 ( $\text{M}^+$ , 12), 104 (75), 56 (100), 43 (23).

# <sup>1</sup>H and <sup>13</sup>C-NMR Spectra

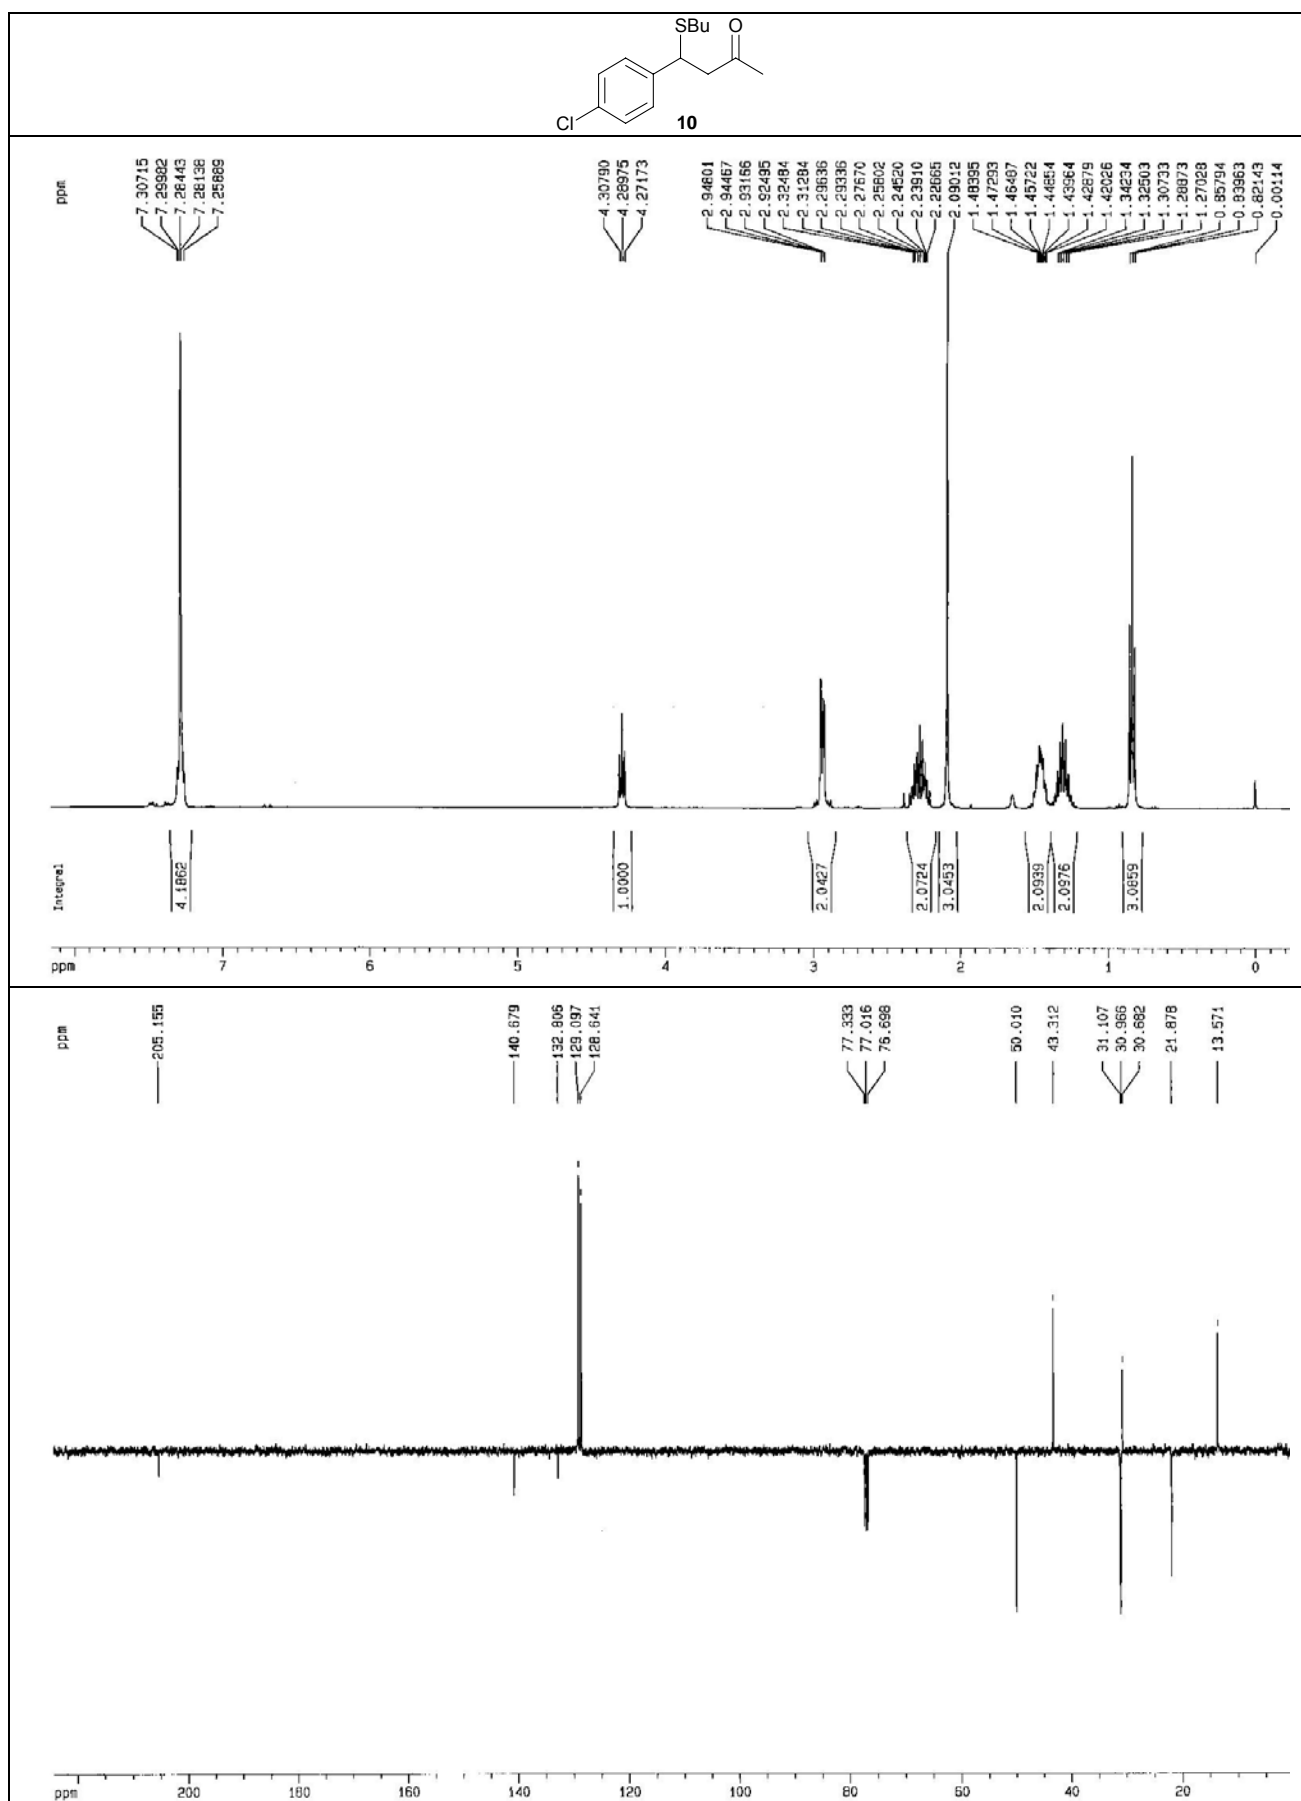

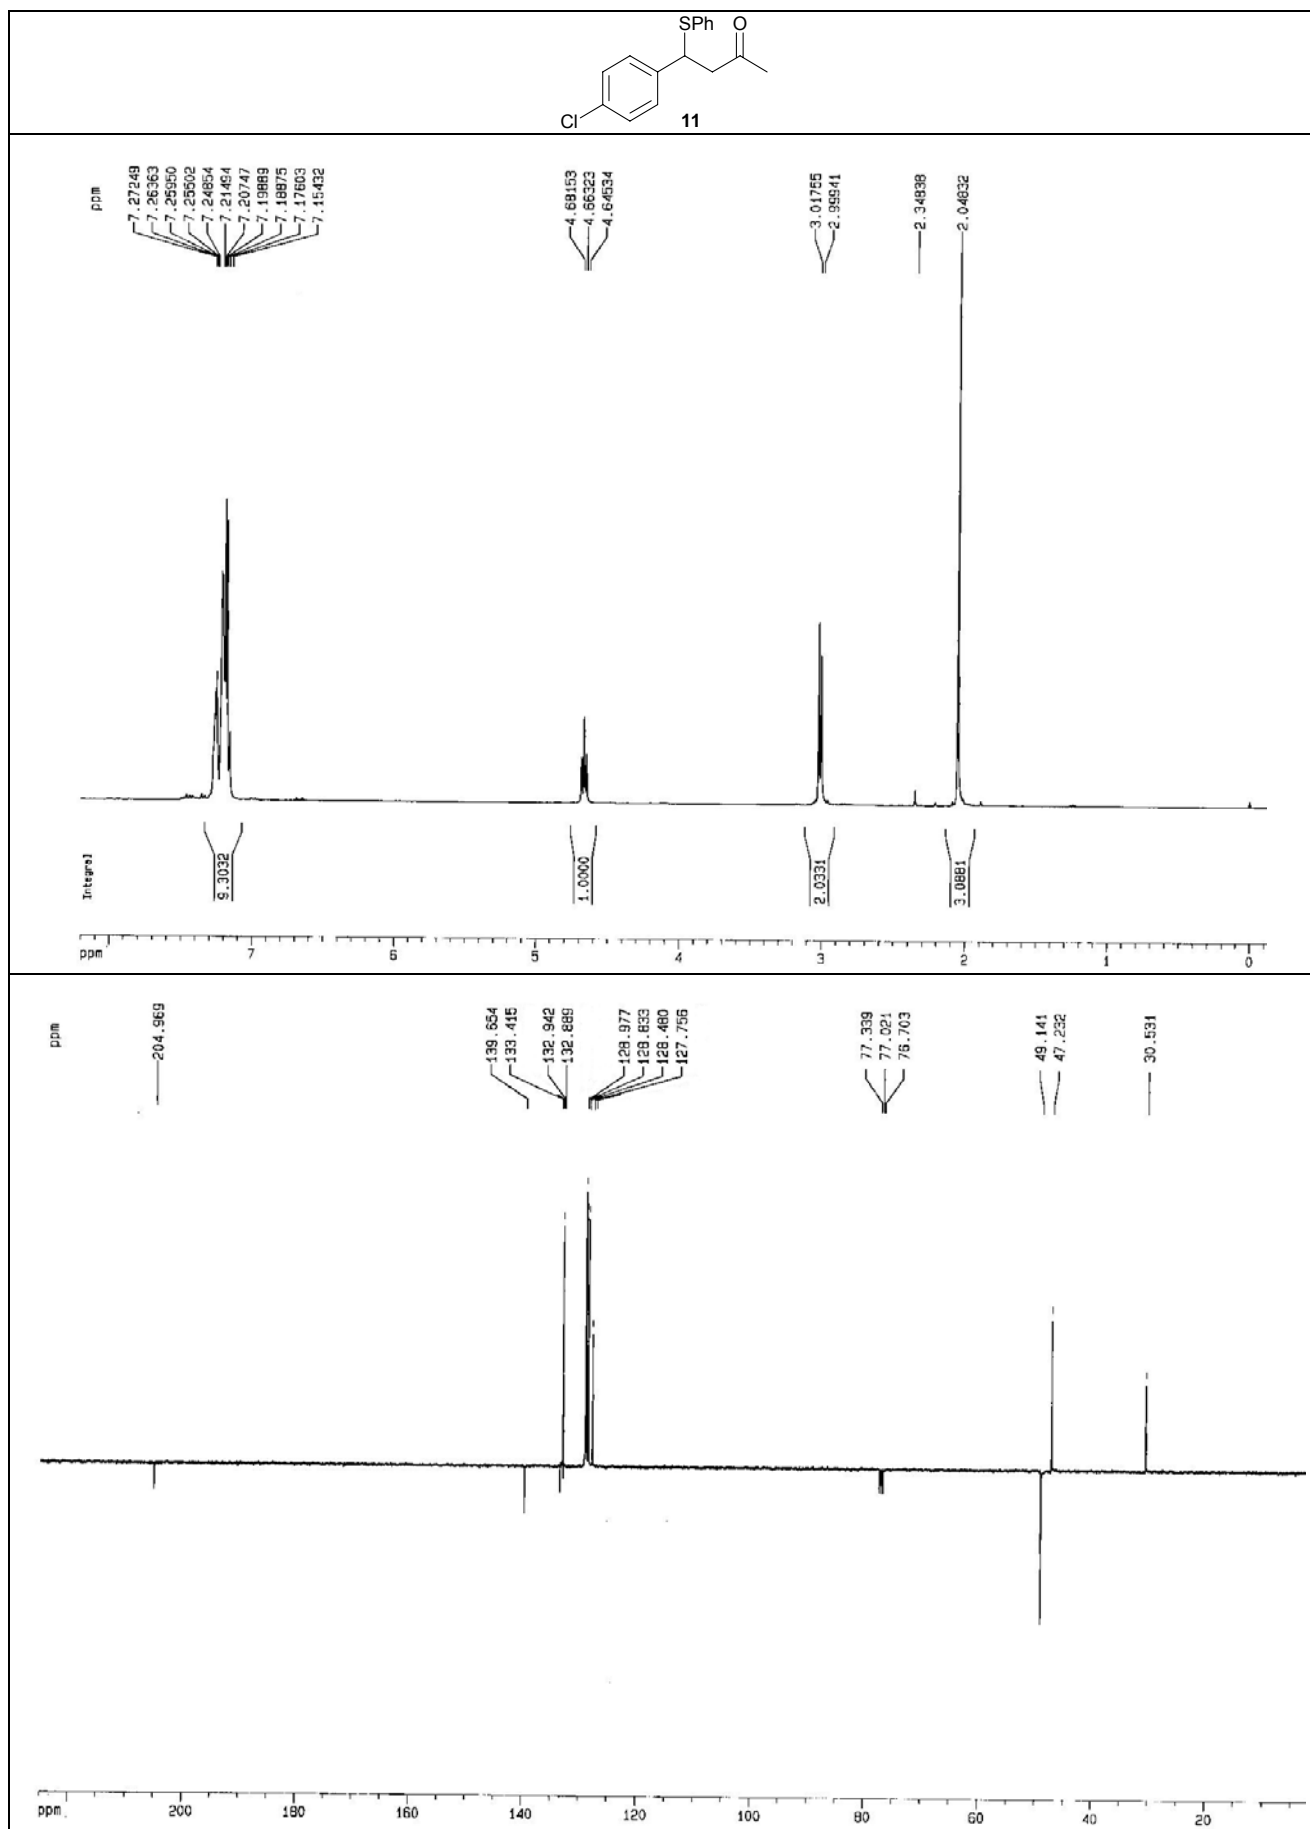

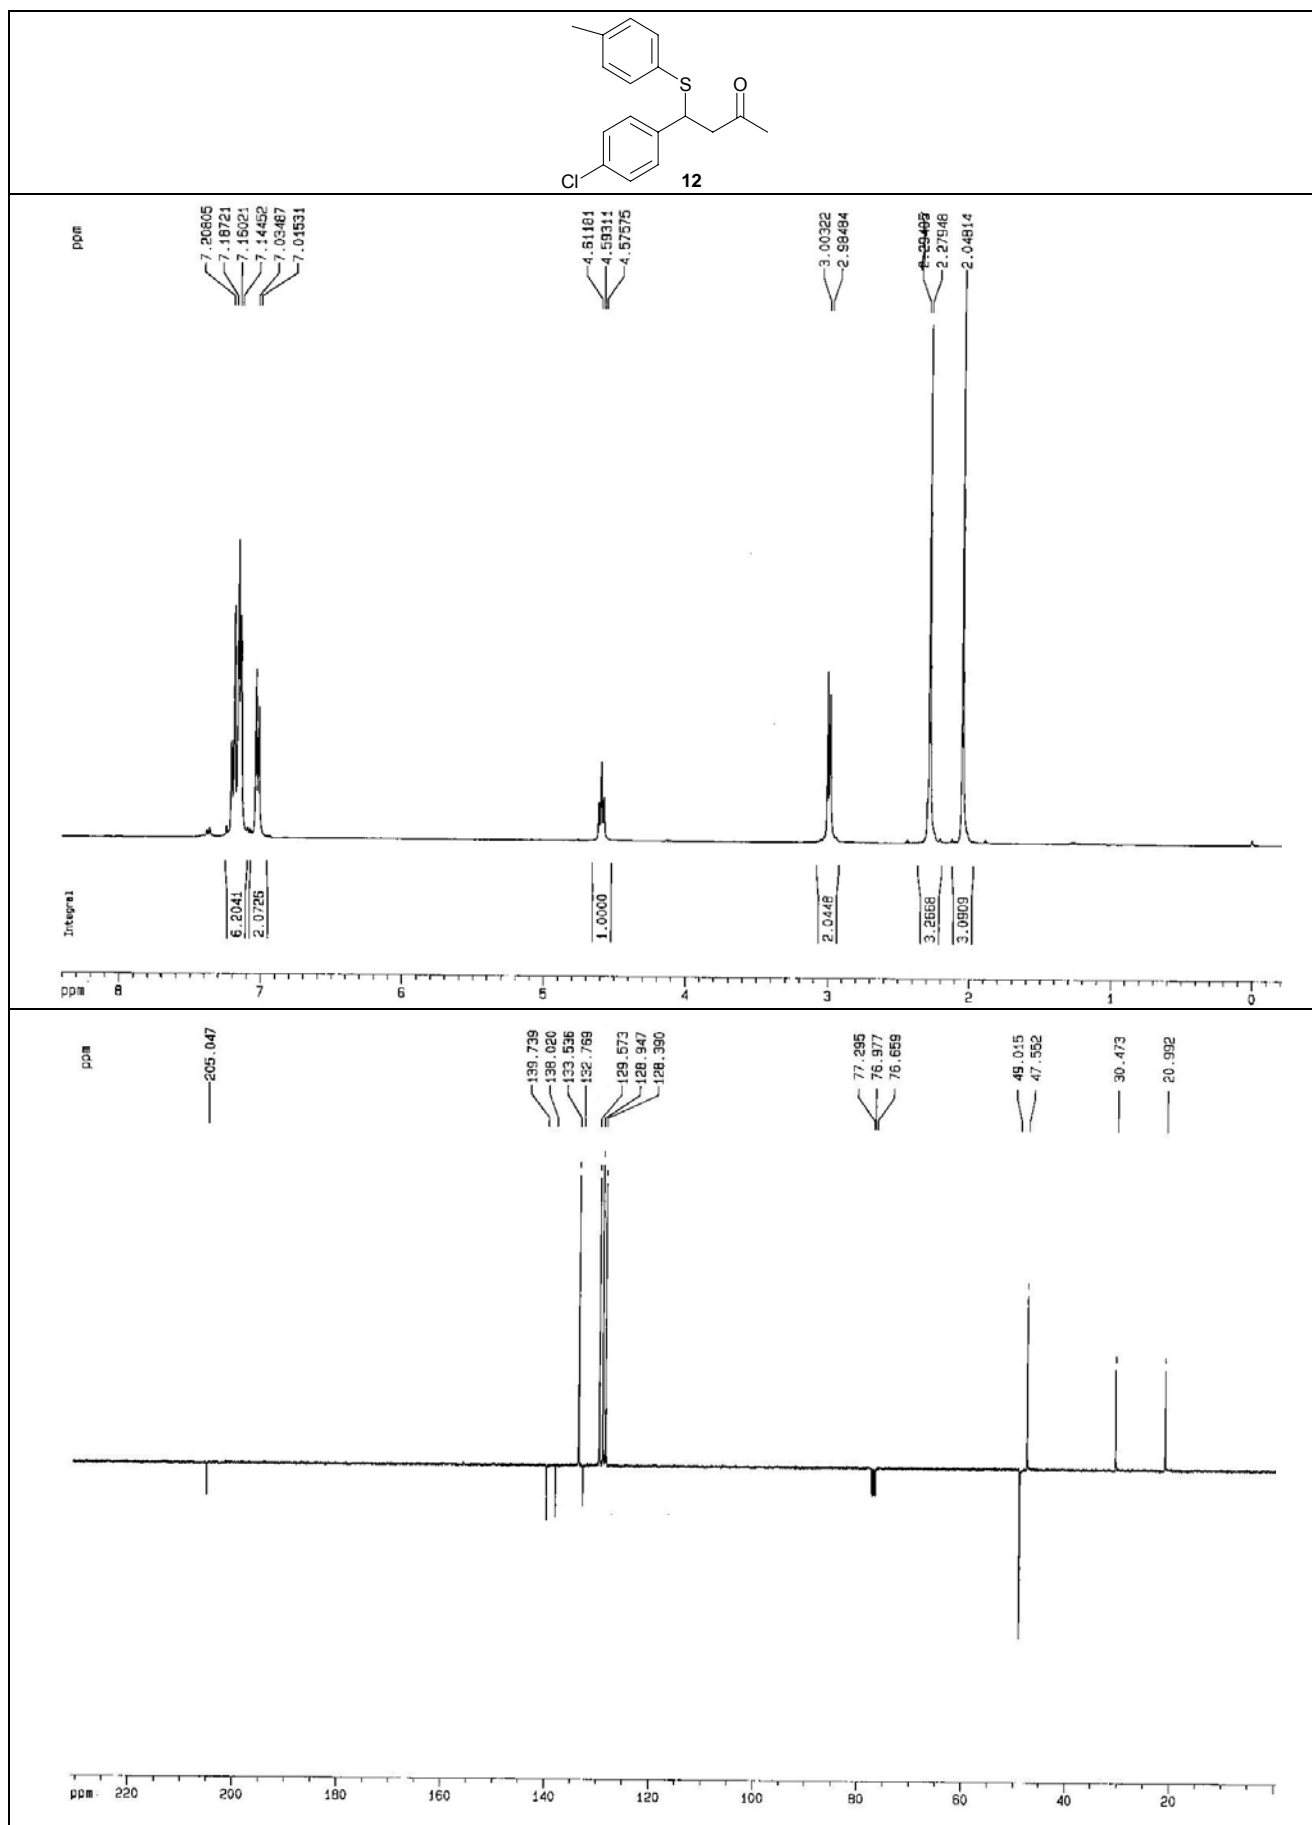

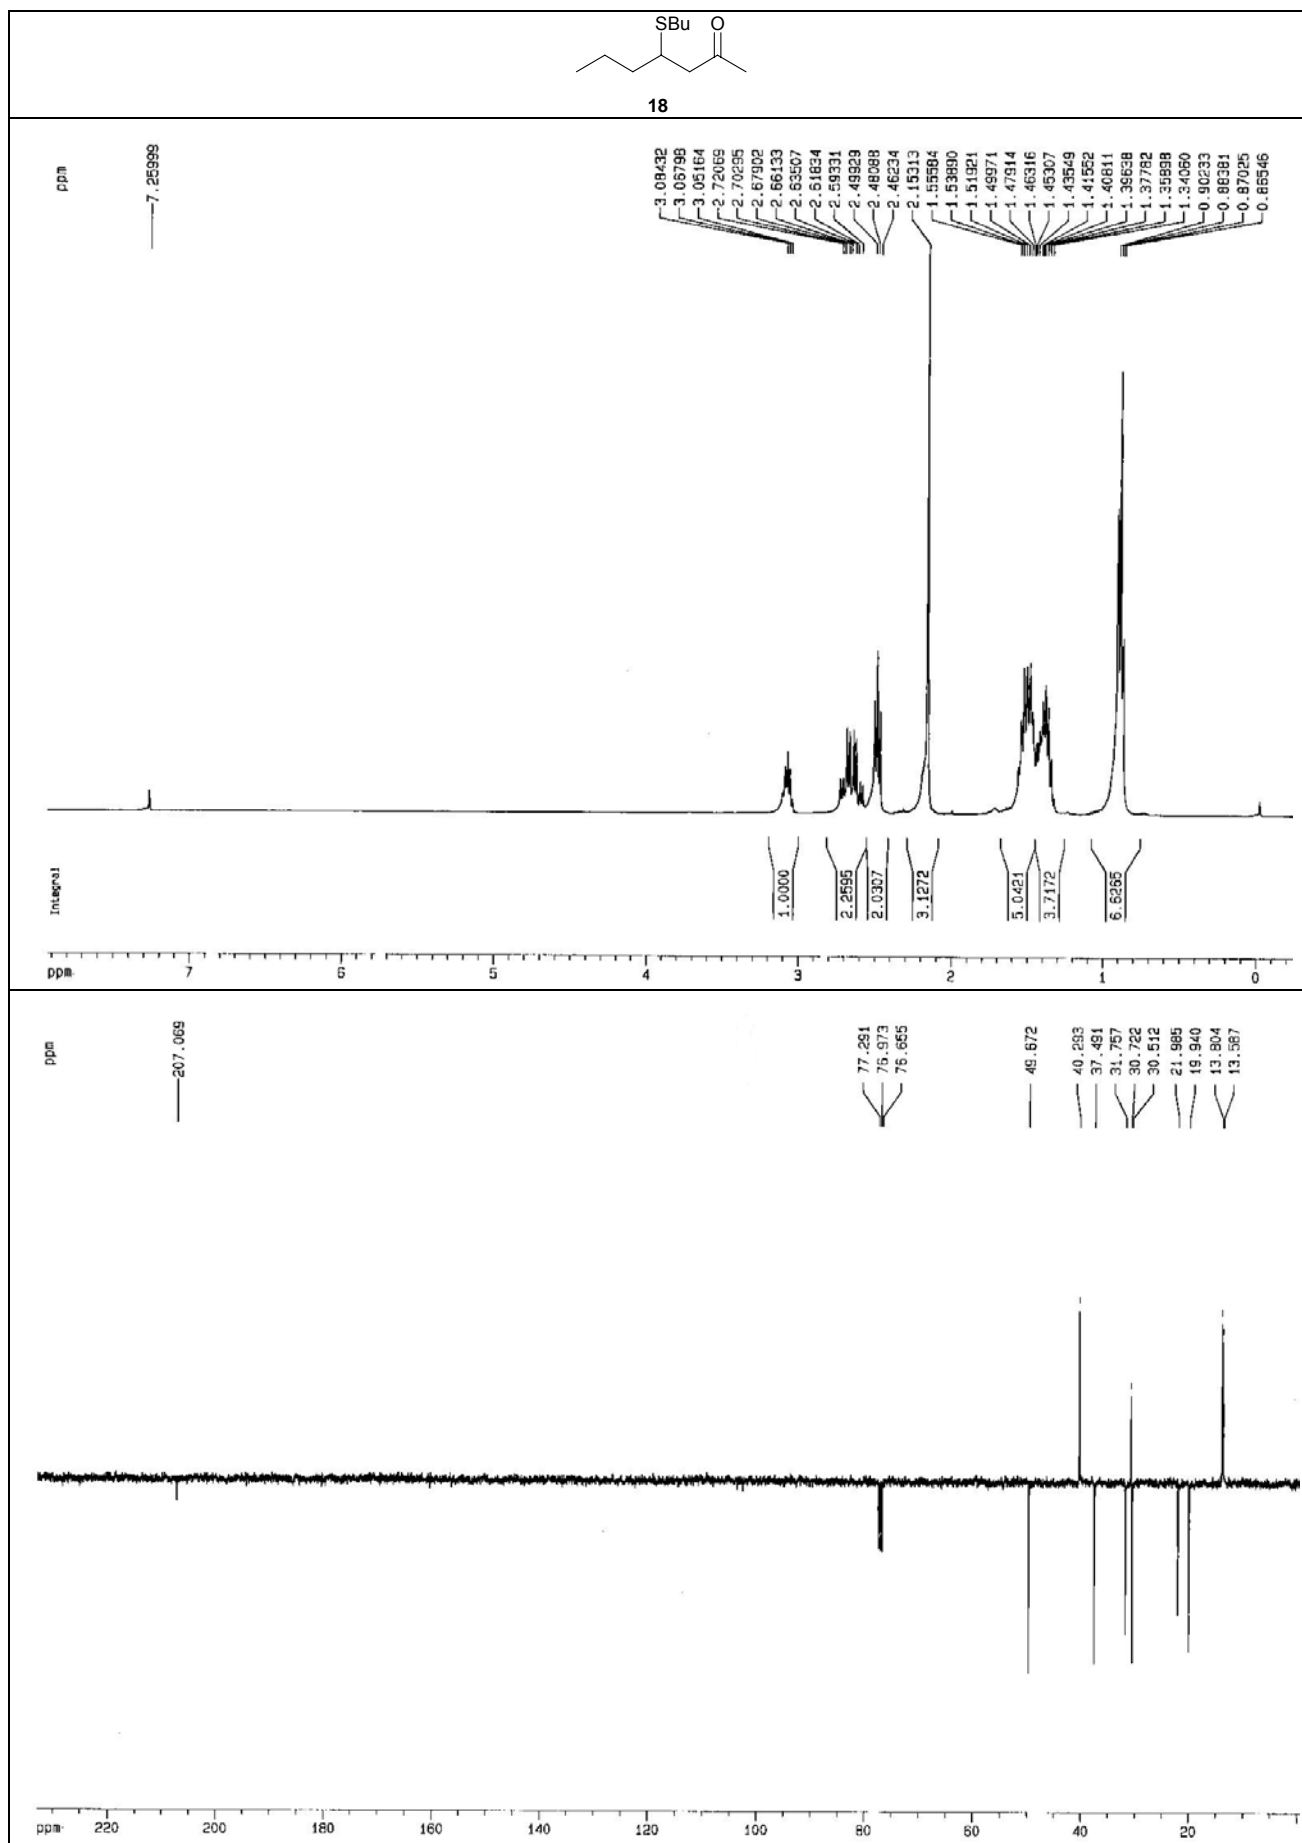

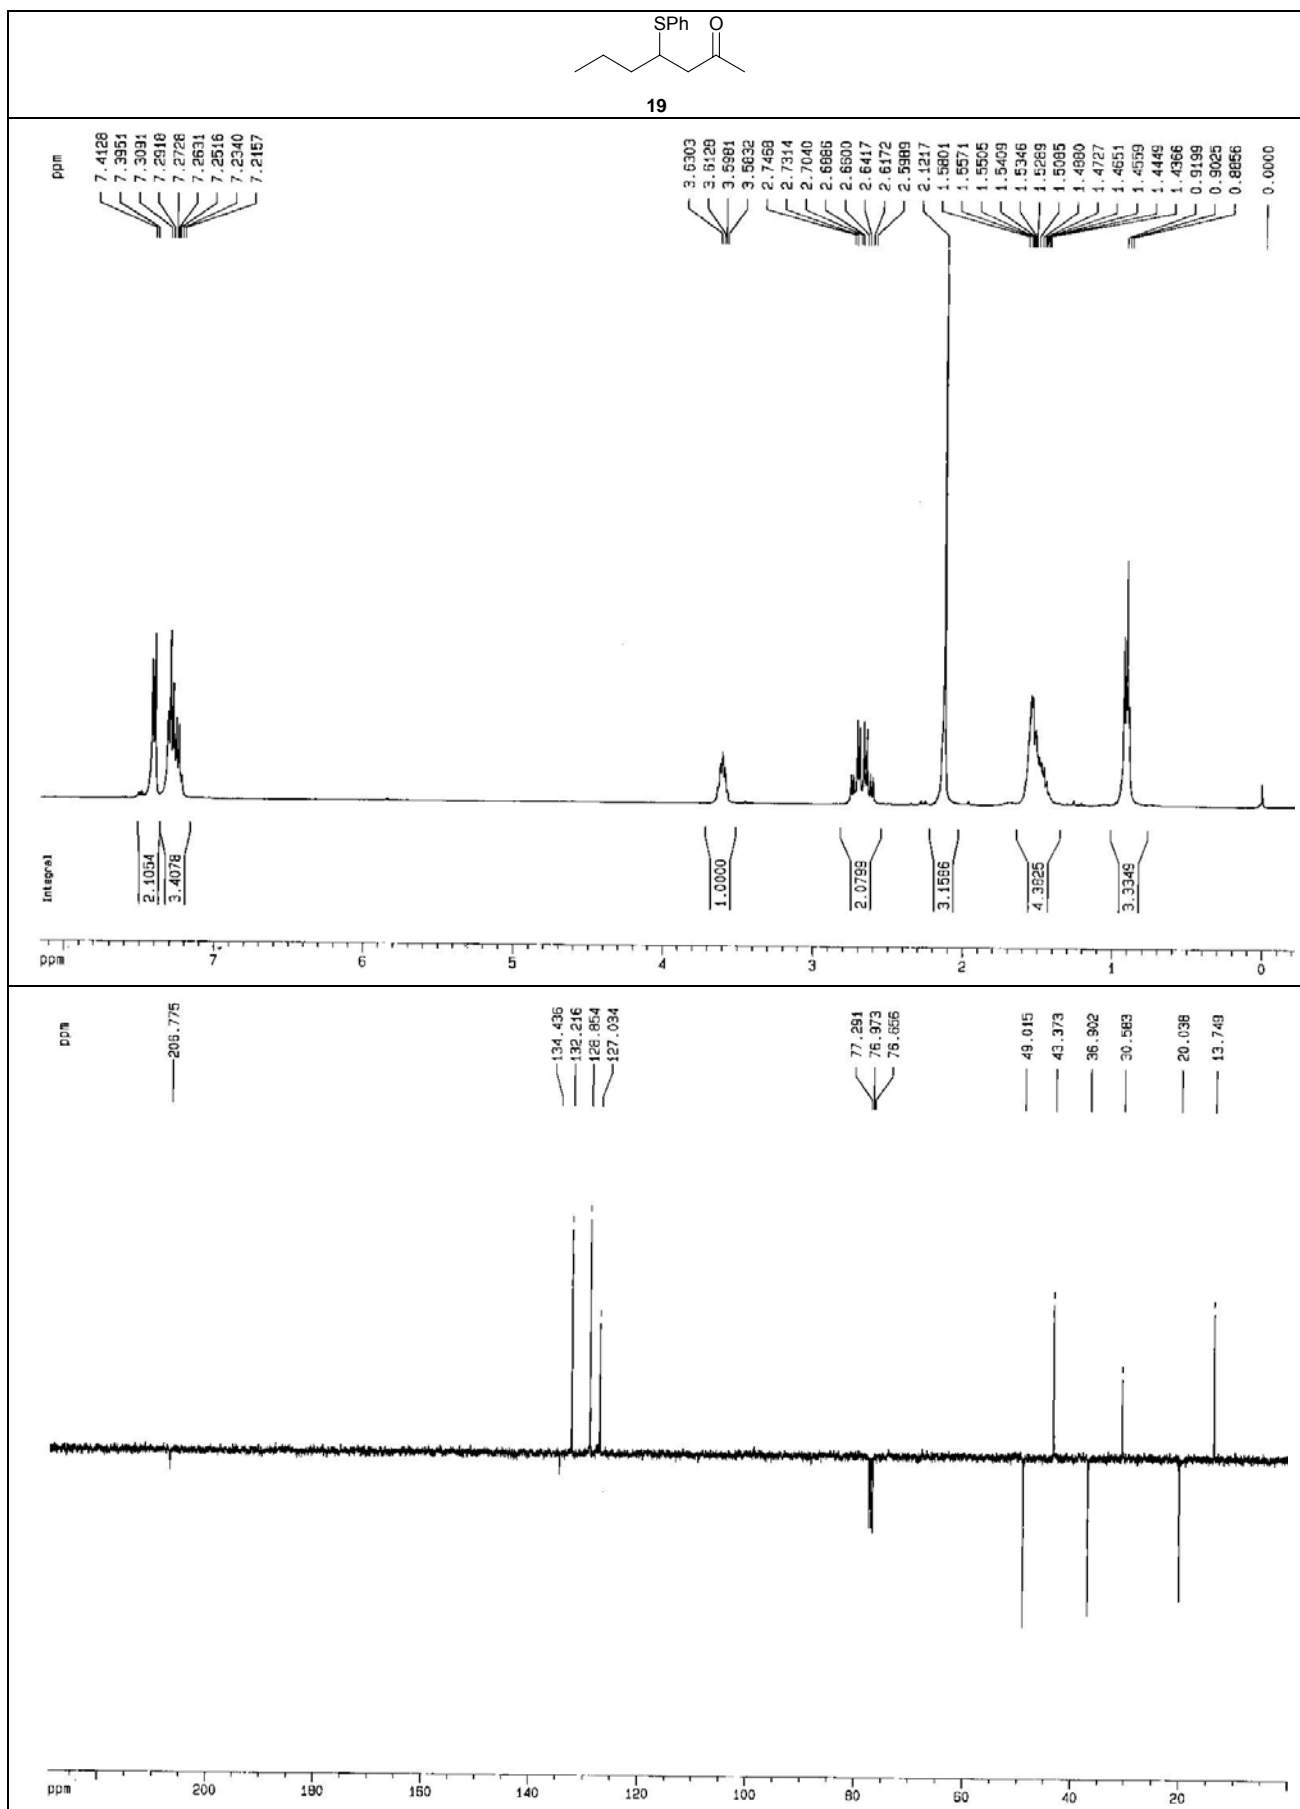

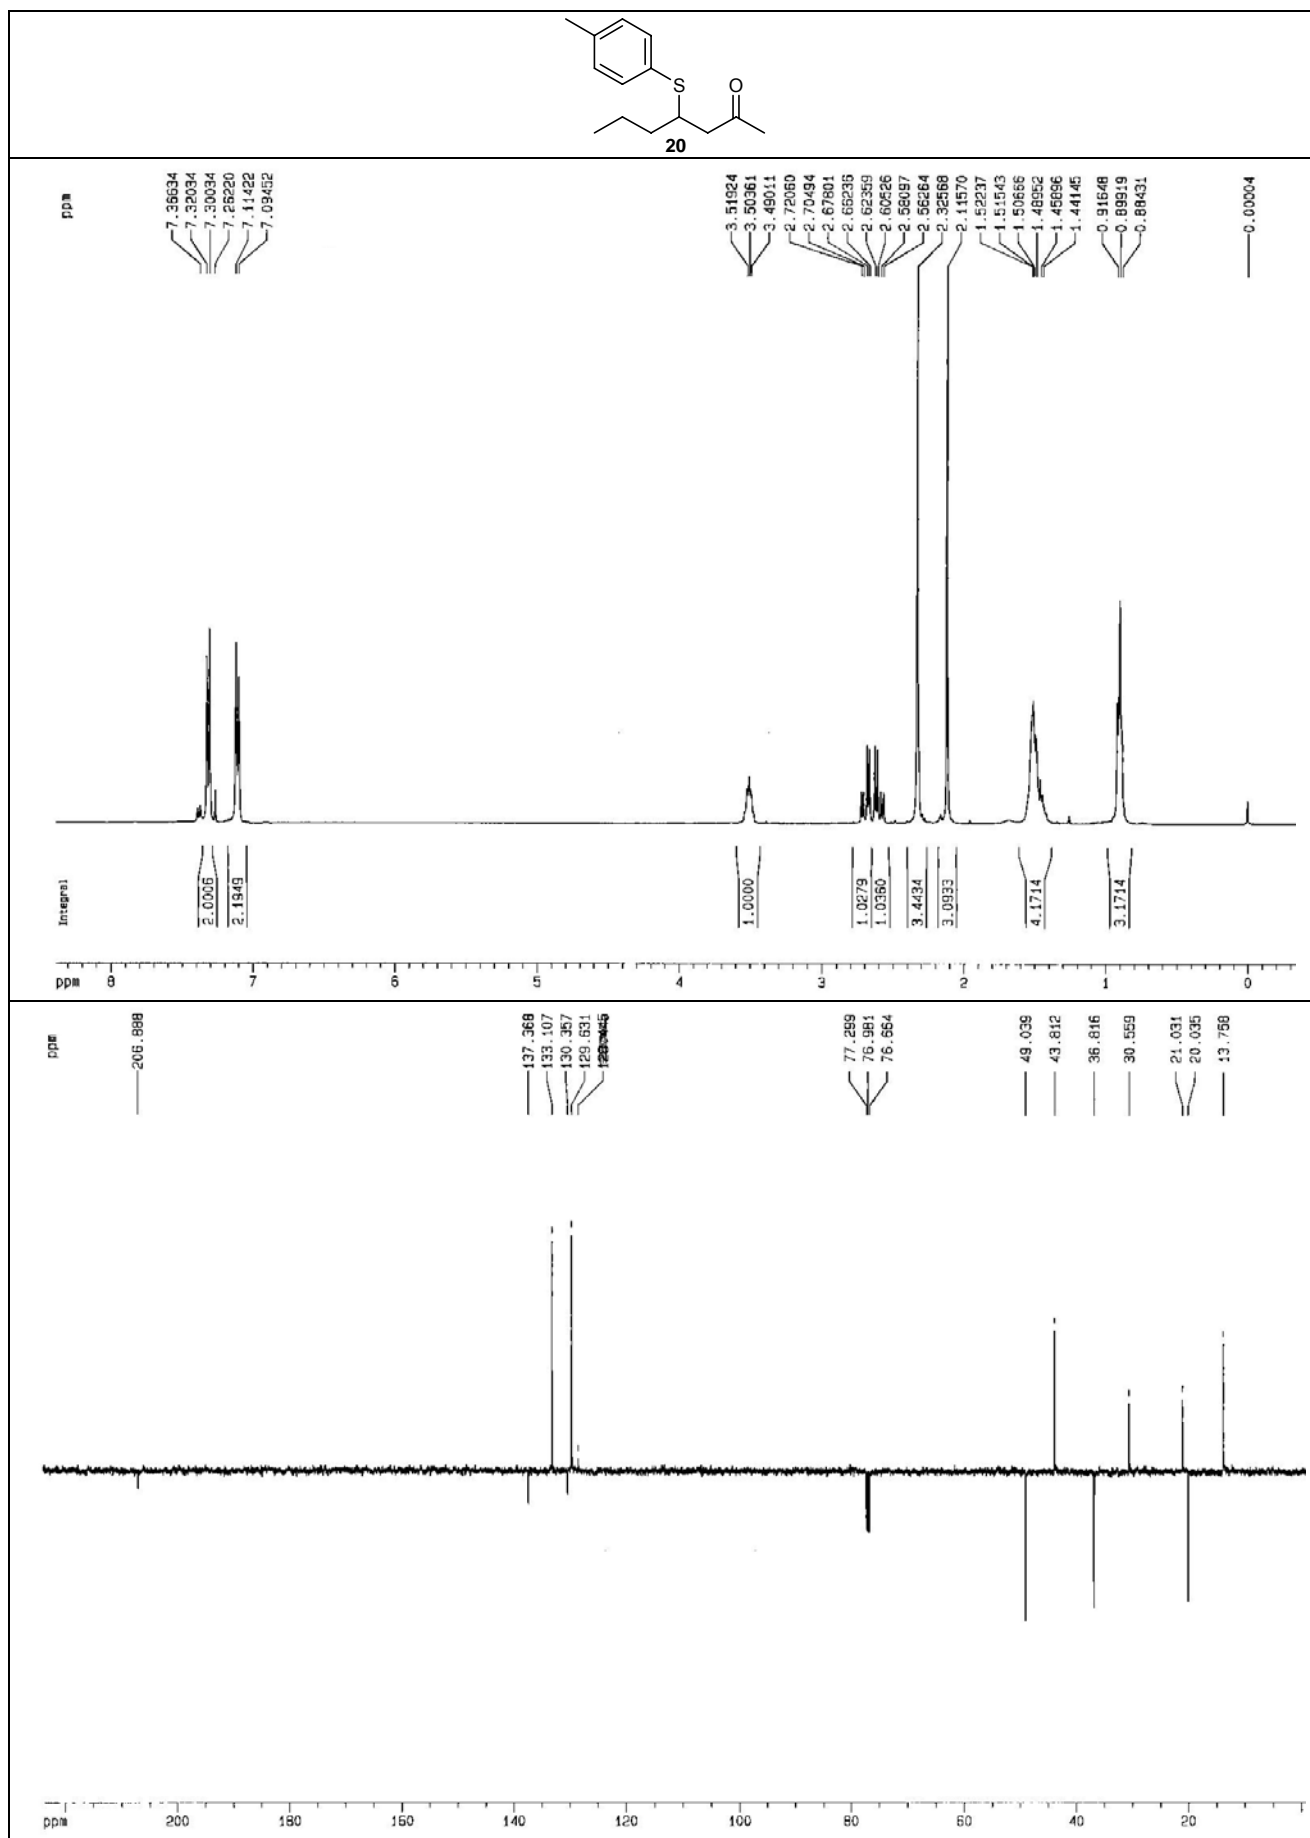



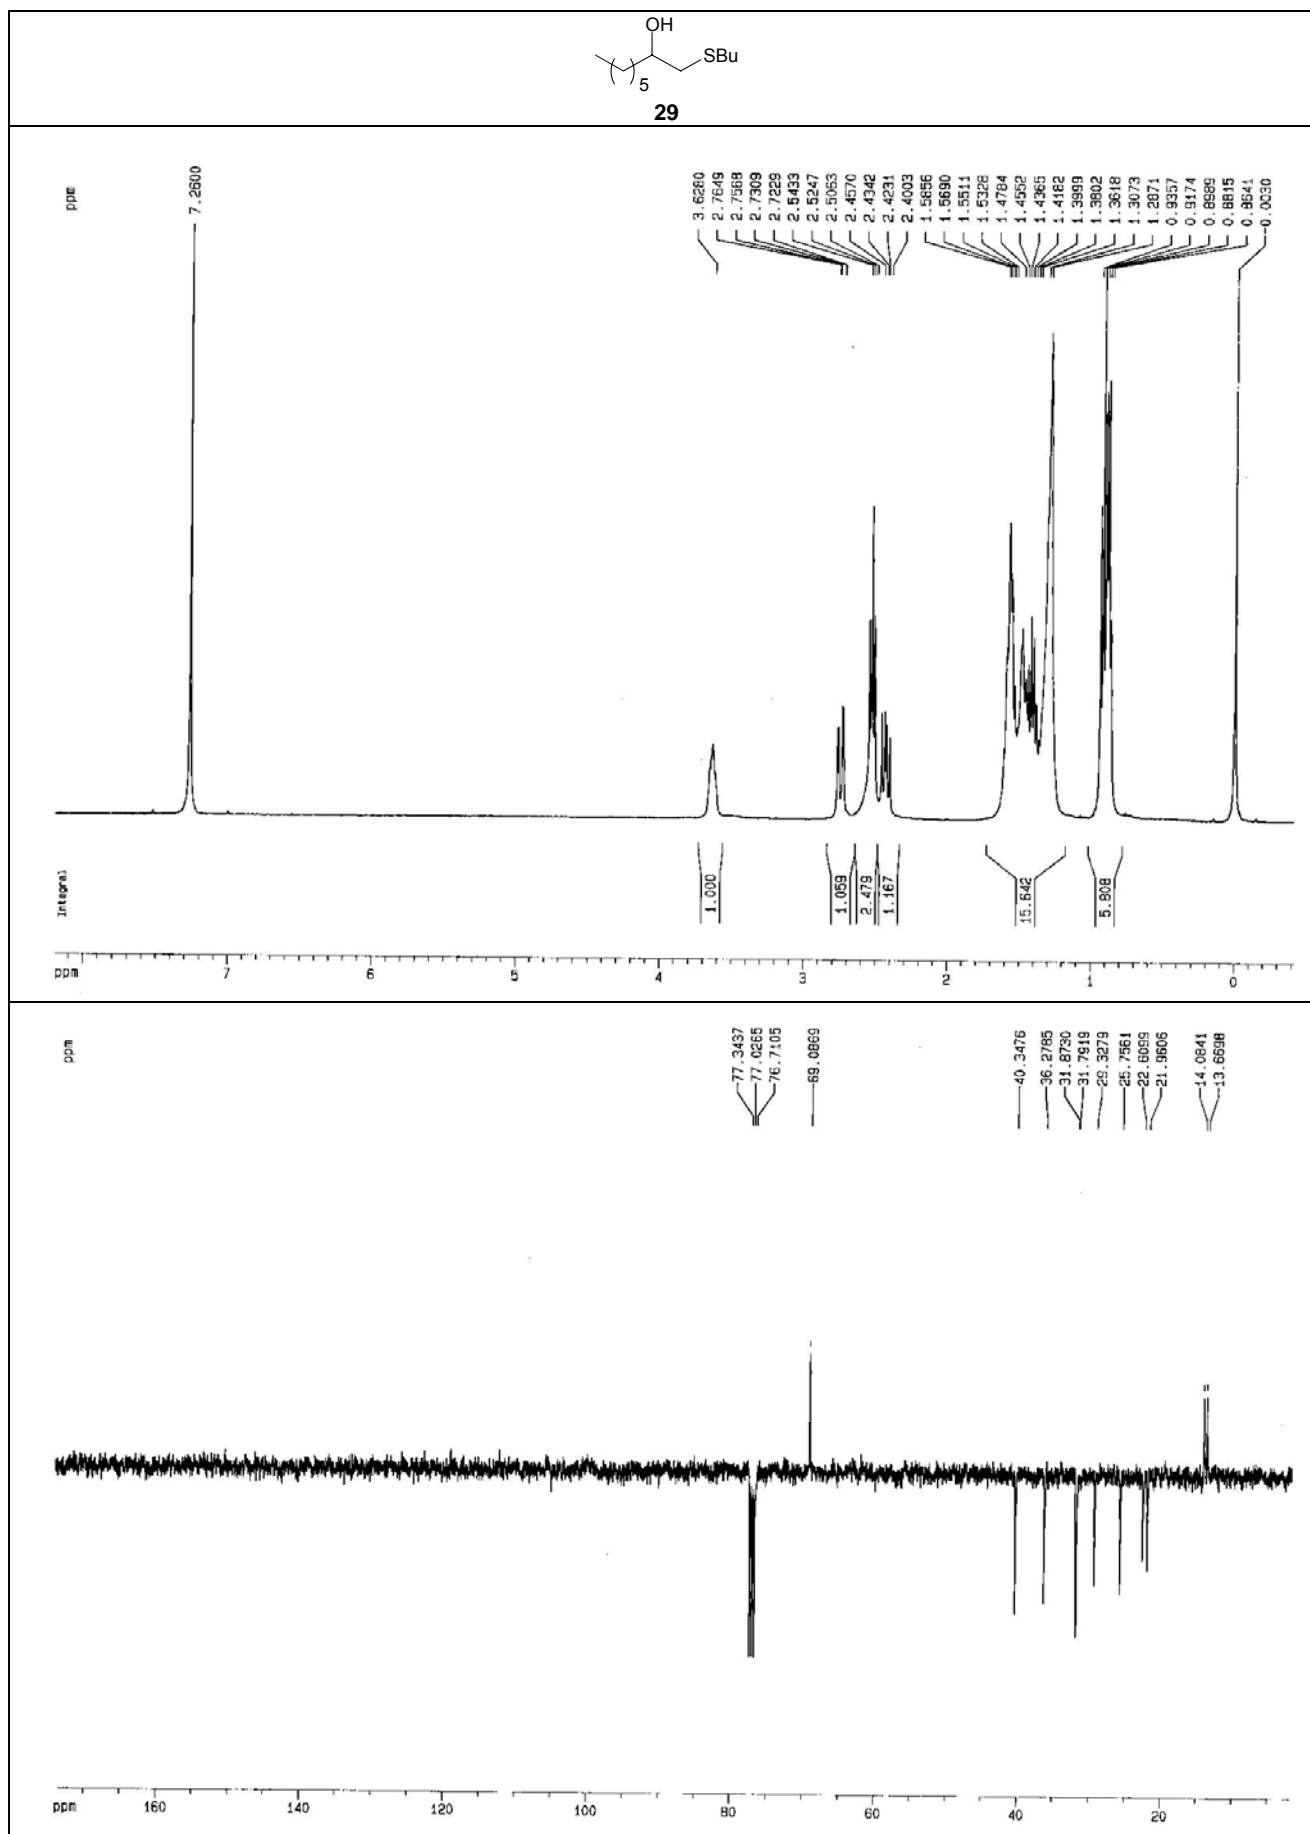

Supplement: c1gc15790f.pdf [file c1gc15790f.pdf]
